# Supplementary material
Source: Springer Nature journal article supplement (https://www.springermedizin.de/resource/supplementary/12885_2014_5102_MOESM4_ESM.pdf/9468368)

**A**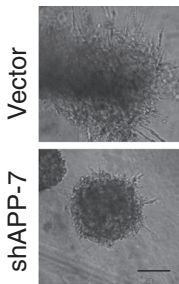**B**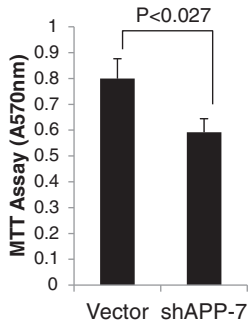**C**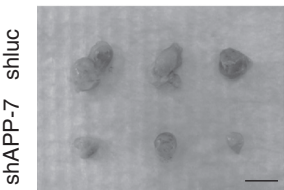**D**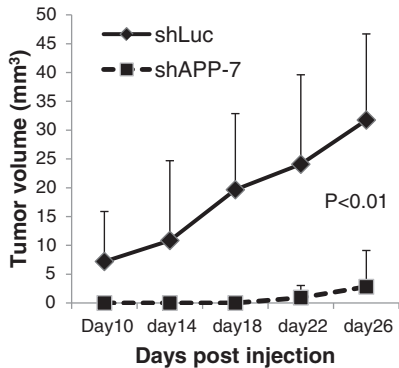

Supplement: MOESM4 [file 9468368]
